# Supplementary material for: HLA-B*27 Heavy Chain Homo-Oligomers Promote the Cytotoxicity of NK Cells via Activation of PI3K/AKT Signaling
Source: MDPI journal article supplement (doi:10.3390/medicina58101411), 2022-10-07
Supplement: s1 [file s1]

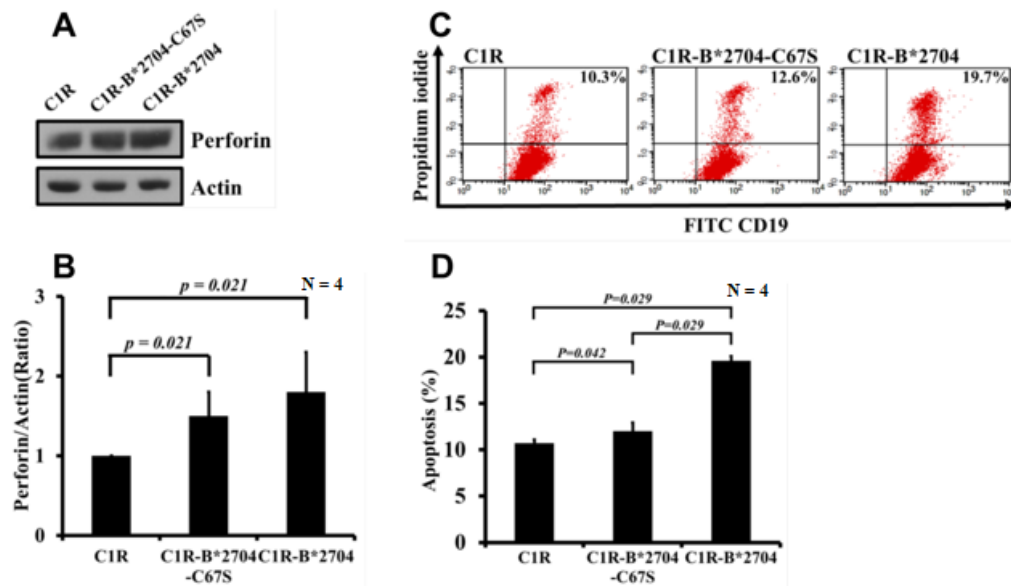

Supplementary Figure S1. The effect of co-culture with C1R, C1R-B\*2704 C67S or C1R-B\*2704 cells on the NK cell-mediated cytotoxicity. NK-92MI cells ( $1 \times 10^6$  cells) were co-cultured with C1R-B\*2704 cells ( $2 \times 10^5$  cells), C1R-B\*2704 C67S ( $2 \times 10^5$  cells) or C1R cells ( $2 \times 10^5$  cells) in MEM- $\alpha$  medium supplemented with sodium bicarbonate (1.5 g/L), 0.2 mM inositol, 0.02 mM folic acid, 0.01 mM 2-mercaptoethanol, 12.5% FBS, 12.5% horse serum and 5% CO<sub>2</sub> at 37°C. For western blotting and cytotoxicity assays, both cells co-cultured in the medium were carried for one day and 4 hours, respectively. (A) Western blotting analysis of the perforin expression in NK-92MI cells co-cultured with C1R, C1R-B\*2704 C67S or C1R-B\*2704. An aliquot (50  $\mu$ g) of extracted proteins was separated by SDS-PAGE and analyzed by western blotting, probed for actin and perforin. (B) The ratio of perforin/actin averaged from four independent experiments in Figure 1A is plotted. (C) Analysis of NK-92MI-mediated cytotoxicity by flow cytometry. The apoptotic cells and C1R cells were stained by propidium iodide and anti-CD19 antibody, respectively. (D) The percentages of apoptotic cells induced by NK-92MI-mediated cytotoxicity averaged from four independent experiments in Fig. 1C are plotted.
